# Supplementary material
Source: PubMed Central journal article supplement (PMC2993418)
Supplement: 1013557107_pnas.1013557107_SI.pdf [file 1013557107_pnas.1013557107_SI.pdf]

# Supporting Information

Yim and Erikson 10.1073/pnas.1013557107

## SI Materials and Methods

**Cell Culture and Synchronization.** HeLa cells were grown in Dulbecco's modified Eagle's medium (Invitrogen) supplemented with 10% fetal bovine serum in the presence of antibiotics in a humidified 5% CO<sub>2</sub> incubator at 37°C. HeLa cells were synchronized with 2.5 mM thymidine (Sigma) for 16 h, released with fresh medium for 8 h, retreated with thymidine for 16 h, released with fresh medium from the double thymidine block, and then samples were prepared at various times. To block cells in S phase, cells were treated with 2 mM hydroxyurea for 12 h. To block cells in M phase, cells were treated with 100 ng/mL nocodazole for 12 h.

**Fluorescence-Activated Cell Sorting (FACS) Analysis.** For determination of the cell cycle phase, cells were collected by trypsinization and fixed in 75% ethanol, stained with 500 µL of 50 µg/mL propidium iodide solution, and subjected to FACS analysis. Cells were sorted by the Becton Dickinson FACScan machine and analyzed by CellQuest software (S1).

**Immunoblot Analysis.** Cells were collected and extracted in lysis buffer [0.5% Triton X-100, 20 mM Tris, pH 7.5, 2 mM MgCl<sub>2</sub>, 1 mM DTT, 1 mM EGTA, 50 mM β-glycerophosphate, 25 mM NaF, 1 mM Na vanadate, 100 µg/mL PMSF, and protease inhibitor cocktail (Roche)]. After adjusting the protein concentration, proteins were resolved by SDS-PAGE and analyzed by Western blot analysis with specific antibodies. Anti-origin replication complex 2 (Orc2), anti-Erk2, anticyclinA, anti-cyclin-dependent kinase (Cdk) 2, anti-Cdk1, and anti-GST polyclonal antibodies and anti-minichromosome maintenance 7 (Mcm7), anti-cell division cycle 6 (Cdc6), and anticyclin B1 monoclonal antibodies were from Santa Cruz. Anti-polo-like kinase 1 (Plk1) monoclonal from Upstate, anti-Cdt1 polyclonal from Bethyl Lab, anti-p-histone H3 polyclonal antibody from Cell Signaling, anti-β-tubulin and anti-FLAG antibody from Sigma, and anti-Cohesin/Rad21 antibody from Novus were used. Immune complexes were revealed with Amersham ECL™ Western blotting detection reagents (GE Healthcare).

**GST Pull-Down Assay.** GST-fused Cdc6 was expressed in *Escherichia coli* strain BL21 and purified using glutathione-sepharose 4B beads (GE Healthcare) according to the manufacturer's instructions. GST-Cdc6 bound to glutathione-sepharose 4B beads were incubated with the lysate of HEK 293T cells that had been expressed with FLAG-tagged Plk1 for 2 h at 4°C. The resins were washed four times with lysis buffer [0.5% Triton X-100, 20 mM Tris, pH 7.5, 2 mM MgCl<sub>2</sub>, 1 mM DTT, 1 mM EGTA, 50 mM β-glycerophosphate, 25 mM NaF, 1 mM Na vanadate, 100 µg/mL PMSF, and protease inhibitor cocktail (Roche)] and subjected to SDS-PAGE and Western blotting with anti-GST (Santa Cruz) and anti-FLAG (Sigma) antibodies.

**Kinase Assay.** For Cdk assays, cyclin A was immunoprecipitated from lysates from cells treated with hydroxyurea for 12 h and then released for 2 h, and cyclin B was immunoprecipitated from lysates treated with nocodazole for 12 h. Lysates with anticyclin A or an anticyclin B1 polyclonal antibody were incubated for 4 h at 4°C with end-over-end mixing, followed by incubation with protein A agarose (Upstate) for 2 h at 4°C. Immunoprecipitates were separated from supernatants by centrifugation and washed with lysis buffer. Activity was assayed with 1 µg histone H1 as substrate in reaction buffer [50 mM Tris pH 7.5, 10 mM MgCl<sub>2</sub>, 1 mM DTT, 1 mM EGTA, 50 mM β-glycerophosphate, 0.1 mM sodium vanadate, 25 mM sodium fluoride, and protease inhibitor cocktail (Roche)] containing immunoprecipitated cyclin A- or cyclin B-associated Cdk, 20 µM ATP, and 10 µCi [ $\gamma$ -<sup>32</sup>P] ATP at 30°C for 30 min. Plk1 activity was assayed with purified His-tagged full-length Cdc6, GST-tagged regions of Cdc6, or 2 µg casein as substrate in reaction buffer (50 mM Tris pH 7.5, 10 mM MgCl<sub>2</sub>, 5 mM DTT, 2 mM EGTA, 0.5 mM sodium vanadate, 20 mM para-nitrophenyl phosphate) containing immunoprecipitated Plk1 protein, 25 µM ATP, and 25 µCi [ $\gamma$ -<sup>32</sup>P] ATP at 30°C for 30 min. The samples were suspended in SDS loading buffer, resolved by SDS-PAGE, and detected by autoradiography (S2).

**Immunoprecipitation Assay.** Cells were extracted in lysis buffer [0.5% Triton X-100, 20 mM Tris, pH 7.5, 2 mM MgCl<sub>2</sub>, 1 mM DTT, 1 mM EGTA, 50 mM β-glycerophosphate, 25 mM NaF, 1 mM Na vanadate, 100 µg/mL PMSF, and protease inhibitor cocktail (Roche)]. Lysates were incubated with anti-Plk1 or anti-GFP polyclonal antibodies or anti-Cdc6 monoclonal antibodies (Santa Cruz) for 4 h at 4°C with end-over-end mixing, followed by incubation with protein A/G agarose (Santa Cruz) for 2 h at 4°C. Immunoprecipitates were separated from supernatants by centrifugation and washed four times with lysis buffer. Proteins were resolved by SDS-PAGE and analyzed by Western blot analysis with anti-Cdc6, anti-Plk1, anti-Cdk1, and anti-Erk2 antibodies.

**Immunofluorescence.** For immunofluorescence, cells were fixed, permeabilized, incubated in 0.1% Triton X-100-PBS containing 3% BSA for blocking, incubated with antipolyclonal Plk1 (Santa Cruz) and anti-Cdc6 (Santa Cruz) antibodies. Cells were washed three times with 0.1% TritonX-100-PBS and then incubated with CyTM3-conjugated anti-mouse secondary antibody and FITC-conjugated anti-rabbit secondary antibody (Jackson Immuno Research Laboratories) and DAPI (Sigma) for staining nuclear DNA. Images were collected and analyzed by the Z series of Applied Precision Deconvolution Microscope and Deltavision software.

1. Yim H, Erikson RL (2009) Polo-like kinase 1 depletion induces DNA damage in early S prior to caspase activation. *Mol Cell Biol* 29:2609–2261.

2. Zhou T, Aumais JP, Liu X, Yu-Lee LY, Erikson RL (2003) A role for Plk1 phosphorylation of NudC in cytokinesis. *Dev Cell* 5:127–138.
